# Supplementary material for: Selected cardiac abnormalities in Trypanosoma cruzi serologically positive, discordant, and negative working dogs along the Texas-Mexico border
Source: PubMed Central journal article supplement (PMC7106864; doi:10.1186/s12917-020-02322-6), 2020-03-30
Supplement: 12917_2020_2322_MOESM1_ESM.pdf [file 12917_2020_2322_MOESM1_ESM.pdf]

| Infection Status | Demographics |     |                  |      |         |                   | 2015 testing |     |        |        | 2017 testing |     |        |        | 4Dx testing              |                            |                             |                |                |
|------------------|--------------|-----|------------------|------|---------|-------------------|--------------|-----|--------|--------|--------------|-----|--------|--------|--------------------------|----------------------------|-----------------------------|----------------|----------------|
|                  | Dog #        | Sex | Breed            | Age  | Sector  | Sleeping Location | StatPak      | IFA | InBios | rt-PCR | StatPak      | IFA | InBios | rt-PCR | Pre-study history of IFA | <i>Dirofilaria immitis</i> | <i>Borrelia burgdorferi</i> | Ehrlichia spp. | Anaplasma spp. |
| Discordant       | 211          | M   | Belgian Malinois | 6.2  | Del Rio | Kennel            | -            | <20 | +      | -      | -            | <20 | +      | -      |                          | -                          | -                           | -              | -              |
|                  | 234          | F   | Belgian Malinois | 10.5 | Del Rio | Home              | -            | <20 | +      | -      | -            | <20 | +      | -      |                          | -                          | -                           | -              | -              |
|                  | 100          | M   | Belgian Malinois | 5.7  | RGV     | Home              | -            | <20 | -      | -      | -            | <20 | -      | -      | 2012-1:20                | +                          | -                           | -              | -              |
|                  | 2            | M   | German Shepherd  | 6.6  | RGV     | Home              | -            | <20 | -      | -      | -            | <20 | -      | -      | 2012-1:80                | -                          | -                           | -              | -              |
|                  | 198          | F   | Belgian Malinois | 8.9  | Laredo  | Home              | -            | <20 | +      | -      | -            | <20 | +      | -      |                          | -                          | -                           | -              | -              |
|                  | 227          | M   | German Shepherd  | 8.9  | Del Rio | Home              | -            | <20 | -      | -      | -            | <20 | -      | -      | 2013-1:20                | -                          | -                           | -              | -              |
| Negative         | 147          | M   | Dutch Shepherd   | 8.1  | Laredo  | Kennel            | -            | <20 | -      | -      | -            | -   | -      | -      |                          | -                          | -                           | -              | -              |
|                  | 164          | M   | Lab              | 6.0  | Laredo  | Kennel            | -            | <20 | -      | -      | -            | -   | -      | -      |                          | -                          | -                           | -              | -              |
|                  | 168          | F   | Belgian Malinois | 8.2  | Laredo  | Home              | -            |     |        | -      | -            | -   | -      | -      |                          | -                          | -                           | -              | -              |
|                  | 210          | M   | Belgian Malinois | 7.1  | Del Rio | Kennel            | -            | <20 | -      | -      | -            | -   | -      | -      |                          | -                          | -                           | -              | -              |
|                  | 257          | F   | Belgian Malinois | 10.0 | Del Rio | Home              | -            |     |        | -      | -            | -   | -      | -      |                          | +                          | -                           | -              | -              |
|                  | 236          | F   | Belgian Malinois | 8.2  | Del Rio | Home              | -            |     |        | -      | -            | -   | -      | -      |                          | -                          | -                           | -              | -              |
|                  | 245          | M   | German Shepherd  | 5.1  | Del Rio | Kennel            | -            | <20 | -      | -      | -            | -   | -      | -      |                          | -                          | -                           | -              | -              |
|                  | 48           | M   | Belgian Malinois | 4.4  | RGV     | Kennel            | -            |     |        | -      | -            |     | +      | -      |                          | -                          | -                           | -              | -              |
|                  | 58           | F   | Belgian Malinois | 7.5  | RGV     | Home              | -            |     |        | -      | -            |     | -      | -      |                          | -                          | -                           | -              | -              |
|                  | 180          | F   | Groenendael      | 4.9  | Laredo  | Home              | -            |     |        | -      | -            |     | -      | -      |                          | -                          | -                           | -              | -              |
|                  | 11           | M   | Dutch Shepherd   | 3.3  | RGV     | Home              | +            | <20 | -      | -      | -            | <20 | +      | -      |                          | -                          | -                           | -              | -              |

|          |     |   |                  |     |         |        |     |     |     |     |   |     |   |   |             |   |   |   |   |
|----------|-----|---|------------------|-----|---------|--------|-----|-----|-----|-----|---|-----|---|---|-------------|---|---|---|---|
|          | 94  | F | Belgian Malinois | 7.5 | RGV     | Home   | -   |     |     | -   | - | -   | - |   |             | - | - | - | - |
|          | 59  | F | Belgian Malinois | 7.0 | RGV     | Home   | -   | <20 | -   | -   | - | -   | - |   |             | - | - | - | - |
|          | 530 | M | Belgian Malinois | 5.2 | Del Rio | Home   | N/A | N/A | N/A | N/A | - | <20 | + | - |             |   | - | - | - |
|          | 16  | M | German Shepherd  | 7.6 | RGV     | Home   | -   | <20 | -   | -   | - | -   | - |   |             | - | - | - | - |
|          | 193 | F | German Shepherd  | 5.2 | Laredo  | Home   | -   |     |     |     | - |     | + | - |             |   | - | - | - |
|          | 54  | M | Belgian Malinois | 3.9 | RGV     | Kennel | -   |     |     |     | - |     | + | - |             |   | - | - | - |
|          | 258 | M | German Shepherd  | 4.0 | Del Rio | Home   | -   | <20 | -   | -   | - | -   | - | - |             |   | - | - | - |
| Positive | 238 | F | Belgian Malinois | 7.9 | Del Rio | Home   | +   | <20 | +   | -   | - | <20 | + | - |             |   | - | - | - |
|          | 369 | F | Belgian Malinois | 7.2 | RGV     | Home   | +   | <20 | +   | -   | + | <20 | + | - |             |   | - | - | - |
|          | 61  | M | Belgian Malinois | 3.5 | RGV     | Home   | +   | <20 | +   | -   | + | <20 | + | - |             |   | - | - | - |
|          | 10  | M | Belgian Malinois | 3.9 | RGV     | Home   | +   | <20 | +   | -   | + | <20 | + | - |             |   | - | - | - |
|          | 252 | M | Dutch Shepherd   | 5.3 | Del Rio | Home   | +   | 160 | +   | -   | + | 320 | + | - |             |   | - | - | - |
|          | 200 | M | Sable Shepherd   | 8.3 | Del Rio | Home   | +   | 20  | +   | -   | - | <20 | - | - |             |   | - | - | - |
|          | 66  | M | Belgian Malinois | 7.3 | RGV     | Home   | -   | <20 | +   | -   | - | <20 | + | - | 2012-1:20   |   | + | - | - |
|          | 159 | F | German Shepherd  | 4.8 | Laredo  | Kennel | +   | 640 | +   | -   | + | 320 | + | - |             |   | - | - | - |
|          | 62  | M | German Shepherd  | 6.1 | RGV     | Home   | n/a | n/a | n/a | n/a | + | 640 | + | - | 2013-1:20   |   | - | - | - |
|          | 53  | M | Belgian Malinois | 5.8 | RGV     | Home   | -   | <20 | +   | -   | + | <20 | - | - | 2013-1:20   |   | - | - | + |
|          | 203 | M | Sable Shepherd   | 5.4 | Del Rio | Home   | +   | 320 | +   | -   | + | 320 | + | - |             |   | - | - | - |
|          | 105 | M | German Shepherd  | 7.4 | Laredo  | Home   | +   | 320 | +   | -   | + | 320 | + | - |             |   | - | - | - |
|          | 60  | M | German Shepherd  | 7.1 | Del Rio | Home   | n/a | n/a | n/a | n/a | + | 320 | + | - | 2016-1:8192 |   | - | - | - |

|     |   |                  |     |        |        |   |     |   |   |   |     |   |             |  |   |   |   |   |
|-----|---|------------------|-----|--------|--------|---|-----|---|---|---|-----|---|-------------|--|---|---|---|---|
| 153 | M | Lab              | 5.1 | Laredo | Kennel | + | <20 | + | - | - | <20 | + | -           |  | - | - | - | - |
| 65  | M | German Shepherd  | 8.0 | RGV    | Home   | + | 320 | + | - | + | 320 | + | -           |  | - | - | - | - |
| 92  | F | Belgian Malinois | 8.4 | RGV    | Home   | + | 320 | + | - | + | 320 | + | 31.32 (Tcl) |  | - | - | - | - |
| 64  | F | Belgian Malinois | 7.8 | RGV    | Home   | + | <20 | + | - | + | <20 | + | -           |  | - | - | - | - |
